# Supplementary material
Source: PubMed Central journal article supplement (PMC9465774)
Supplement: sj-pdf-1-han-10.1177_1558944720974119.pdf [file sj-pdf-1-han-10.1177_1558944720974119.pdf]

**Supplementary Table 1** Data Collected from Studies, Patients, and Joints

|                                           | Number of Studies |    | Patients (%)                                     | MCPJ (%)   | PIPJ (%)   |
|-------------------------------------------|-------------------|----|--------------------------------------------------|------------|------------|
| <b>Complications Studies</b>              |                   |    |                                                  |            |            |
| Complications                             | 20                |    | 2675 (-) <sup>4-19,26-28,30</sup>                | 1946 (-)   | 1807 (-)   |
| Major Surgical AE's                       | 16                |    | 2300 (86%) <sup>5-13,26-28,30</sup>              | 1504 (77%) | 1594 (88%) |
| Minor AE's                                | 16                |    | 2054 (77%) <sup>4,5,7-9,11,12,14-19,26,30</sup>  | 1826 (94%) | 1104 (61%) |
| Initial Contracture                       | MCPJ              | 7  | 529 (20%) <sup>5,7,10,11,13,28,30</sup>          | 383 (20%)  |            |
|                                           | PIPJ              | 8  | 542 (20%) <sup>7,10,11,13,16,19,28,30</sup>      | 292 (16%)  |            |
| Post CCH Contracture                      | MCPJ              | 2  | 80 (3.0%) <sup>7,13</sup>                        | 94 (4.8%)  |            |
|                                           | PIPJ              | 3  | 109 (3.9%) <sup>7,13,16</sup>                    | 112 (6.2%) |            |
| ROM Change                                | MCPJ              | 2  | 263 (9.8%) <sup>7,12</sup>                       | 208 (11%)  |            |
|                                           | PIPJ              | 3  | 292 (11%) <sup>7,12,16</sup>                     | 165 (9.1%) |            |
| Clinical Success                          | MCPJ              | 13 | 1787 (67%) <sup>4,7-12,14,17-19,26,27</sup>      | 1715 (88%) |            |
|                                           | PIPJ              | 14 | 2358 (88%) <sup>4,6-12,14,16-19,27</sup>         | 1739 (96%) |            |
| <b>Recurrence Studies</b>                 |                   |    |                                                  |            |            |
| Recurrences                               | 15                |    | 1488 (-) <sup>9,11,15-17,19-21,23-26,28,29</sup> | 1308 (-)   | 761 (-)    |
| Interventions performed                   | 10                |    | 1293 (87%) <sup>9,11,16,19,21-23,26,28,29</sup>  | 1137 (87%) | 675 (89%)  |
| Initial Contracture Angle on Presentation | MCPJ              | 6  | 494 (33%) <sup>11,19-21,24</sup>                 | 415 (32%)  |            |
|                                           | PIPJ              | 7  | 523 (35%) <sup>11,16,19-21,24,28</sup>           | 212 (28%)  |            |
| Post CCH Contracture Angle                | MCPJ              | 1  | 25 (1.7%) <sup>22</sup>                          | 21 (1.6%)  |            |
|                                           | PIPJ              | 2  | 54 (3.6) <sup>16,22</sup>                        | 61 (8.0%)  |            |
| ROM Change                                | MCPJ              | 0  | -                                                | -          |            |
|                                           | PIPJ              | 2  | 107 (7.2%) <sup>16,24</sup>                      | 77 (10%)   |            |
| Clinical Success                          | MCPJ              | 11 | 1332 (90%) <sup>9,11,17,19-25</sup>              | 1189 (91%) |            |
|                                           | PIPJ              | 10 | 1302 (88%) <sup>9,11,16,19-24,26</sup>           | 737 (97%)  |            |
